# Supplementary material for: Phase-transfer hydroxylation of benzene with H2O2 catalyzed by a nitrile-functionalized pyridinium phosphovanadomolybdate
Source: Royal Society of Chemistry journal article supplement (doi:10.1039/c3cy20796j), 2013-01-01
Supplement: c3cy20796j.pdf [file c3cy20796j.pdf]

## Electronic Supplementary Information

### Phase-transfer hydroxylation of benzene with H<sub>2</sub>O<sub>2</sub> catalyzed by a nitrile-functionalized pyridinium phosphovanadomolybdate

Pingping Zhao, Jun Wang\*, Guojian Chen, Yu Zhou, and Jun Huang

State Key Laboratory of Materials-Oriented Chemical Engineering, College of Chemistry and Chemical Engineering, Nanjing University of Technology, Nanjing 210009, China.

\* Corresponding author, e-mail: junwang@njut.edu.cn

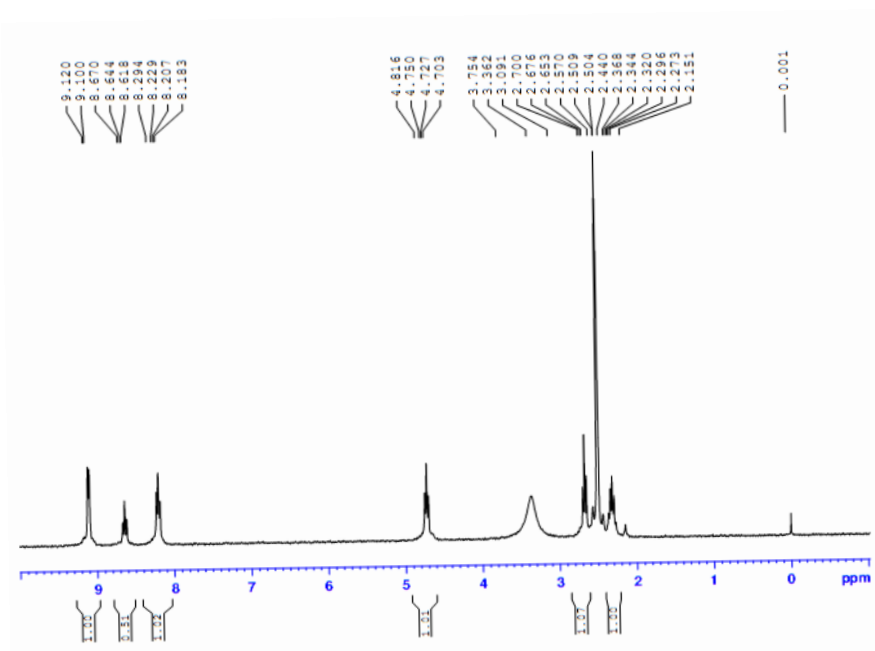

**Fig. S1.** <sup>1</sup>H NMR spectrum of [C<sub>3</sub>CNpy]<sub>4</sub>HPMoV<sub>2</sub>

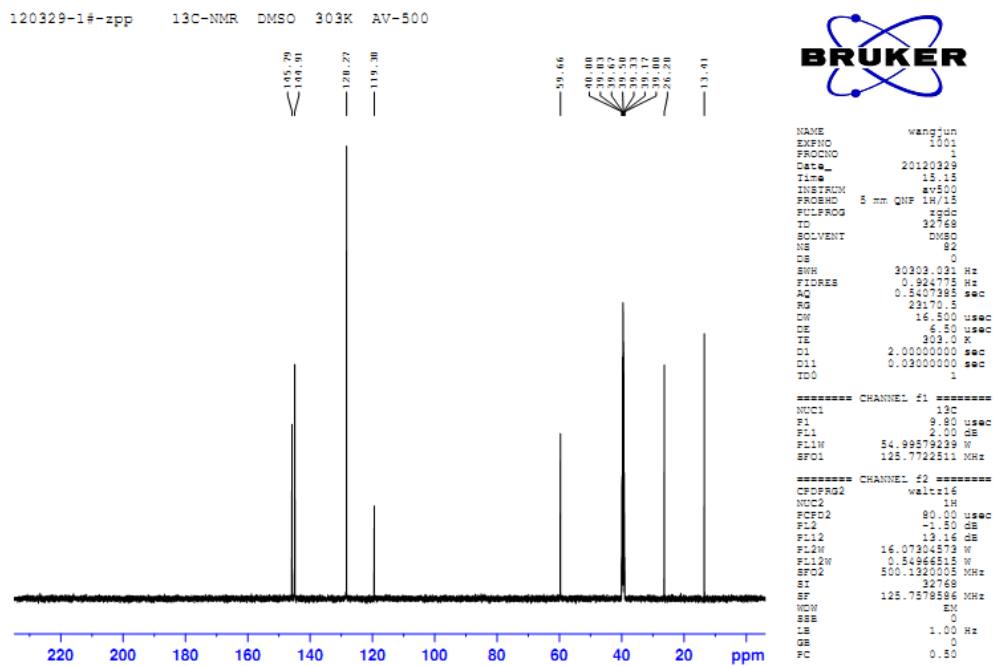

Fig. S2.  $^{13}\text{C}$  NMR spectrum of  $[\text{C}_3\text{CNpy}]_4\text{HPMoV}_2$

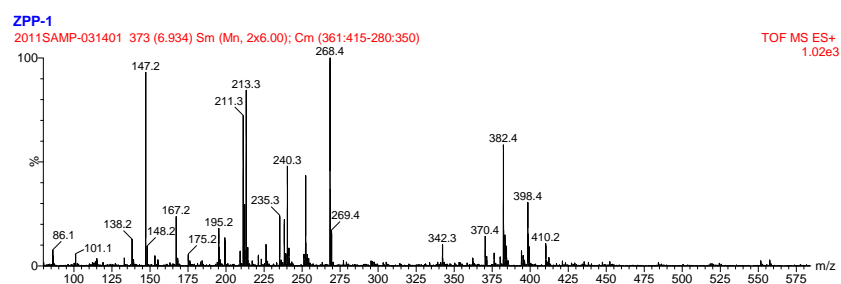

**Fig. S3A.** Positive-ion ESI-MS of  $[\text{C}_3\text{CNpy}]_4\text{HPMoV}_2$

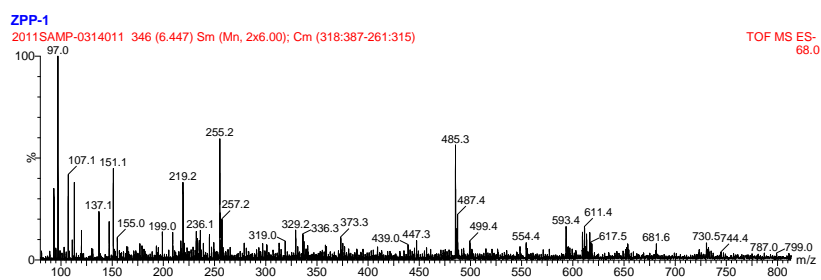

**Fig. S3B.** Negative-ion ESI-MS of  $[\text{C}_3\text{CNpy}]_4\text{HPMoV}_2$

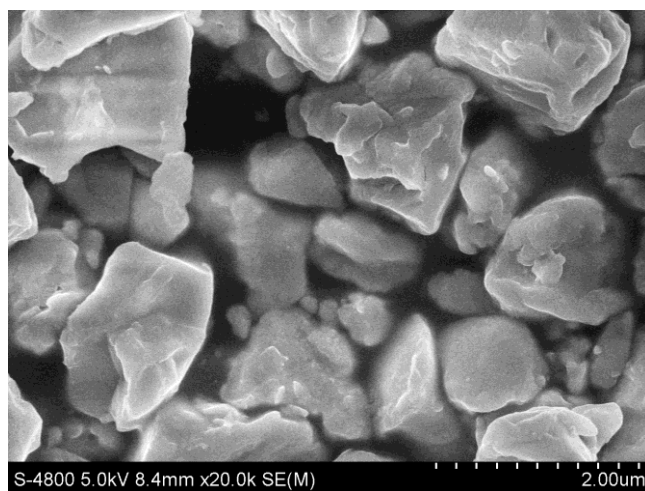

**Fig. S4.** SEM image of [C<sub>3</sub>CNpy]<sub>4</sub>HPMoV<sub>2</sub>
